# Supplementary material for: Semaphorin 7a is a biomarker for recurrence in postpartum breast cancer
Source: PubMed Central journal article supplement (PMC7572422; doi:10.1038/s41523-020-00198-1), 2020-10-19
Supplement: 41523_2020_198_MOESM1_ESM.pdf [file 41523_2020_198_MOESM1_ESM.pdf]

|                                     |                                                                  | Nullip        | PPBC          | p     | test  |
|-------------------------------------|------------------------------------------------------------------|---------------|---------------|-------|-------|
| <b>n (%)</b>                        |                                                                  | 47            | 66            |       |       |
| <b>Age at Diagnosis (mean (SD))</b> |                                                                  | 36.64 (±5.45) | 35.85 (±5.04) | 0.429 |       |
| <b>Race</b>                         | White                                                            | 38 (80.8)     | 49 (74.2)     | 0.261 | exact |
|                                     | Black                                                            | 0             | 4 (6.0)       |       |       |
|                                     | Hispanic                                                         | 3 (6.4)       | 1 (1.5)       |       |       |
|                                     | Other                                                            | 1 (2.1)       | 2 (3.0)       |       |       |
|                                     | Unknown                                                          | 5 (10.6)      | 10 (15.2)     |       |       |
| <b>Tumor Histologic Subtype</b>     | Ductal                                                           | 42 (89.4)     | 52 (78.8)     | 0.406 | exact |
|                                     | Ductal + lobular                                                 | 1 ( 2.1)      | 1 ( 1.5)      |       |       |
|                                     | Inflammatory                                                     | 2 ( 4.3)      | 2 ( 3.0)      |       |       |
|                                     | Lobular                                                          | 2 ( 4.3)      | 6 ( 9.1)      |       |       |
|                                     | Missing                                                          | 0 ( 0.0)      | 1 ( 1.5)      |       |       |
|                                     | Other                                                            | 0 ( 0.0)      | 4 ( 6.1)      |       |       |
| <b>Stage</b>                        | I                                                                | 6 ( 12.8)     | 7 ( 10.6)     | 0.468 | exact |
|                                     | II                                                               | 35 ( 74.5)    | 43 ( 65.2)    |       |       |
|                                     | III                                                              | 5 ( 10.6)     | 11 ( 16.7)    |       |       |
|                                     | IV                                                               | 1 ( 2.1)      | 5 ( 7.6)      |       |       |
| <b>LN</b>                           | Negative                                                         | 16 (34.0)     | 22 (33.3)     | 0.436 | exact |
|                                     | Positive                                                         | 28 (59.6)     | 43 (65.2)     |       |       |
|                                     | Unknown                                                          | 3 ( 6.4)      | 1 ( 1.5)      |       |       |
| <b>Estrogen Receptor Status</b>     | ER-                                                              | 16 ( 34.0)    | 21 ( 31.8)    | 0.841 | exact |
|                                     | ER+                                                              | 31 ( 66.0)    | 45 ( 68.2)    |       |       |
| <b>Progesterone Receptor Status</b> | Missing                                                          | 0 ( 0.0)      | 1 ( 1.5)      | 0.824 | exact |
|                                     | PR-                                                              | 20 ( 42.6)    | 25 ( 37.9)    |       |       |
|                                     | PR+                                                              | 27 ( 57.4)    | 40 ( 60.6)    |       |       |
| <b>Tumor Biologic Subtype</b>       | Luminal A (ER+/PR+/Her2-)                                        | 10 ( 21.3)    | 11 ( 16.7)    | 0.897 | exact |
|                                     | Luminal B (ER+/ PR+,-/ Her2 + or Her2-, and high Ki67)           | 21 ( 44.7)    | 33 ( 50.0)    |       |       |
|                                     | Luminal Unknown (ER + but unable to distinguish Luminal A and B) | 1 ( 2.1)      | 1 ( 1.5)      |       |       |
|                                     | Triple Negative ( ER-/PR-/HER2-)                                 | 15 ( 31.9)    | 21 ( 31.8)    |       |       |
| <b>Tumor Pathologic Grade</b>       | Grade I                                                          | 3 ( 6.4)      | 6 ( 9.1)      | 0.922 | exact |
|                                     | Grade II                                                         | 15 ( 31.9)    | 20 ( 30.3)    |       |       |
|                                     | Grade III                                                        | 26 ( 55.3)    | 34 ( 51.5)    |       |       |
|                                     | Missing                                                          | 3 ( 6.4)      | 6 ( 9.1)      |       |       |
| <b>LVI</b>                          | Absent                                                           | 18 (38.3)     | 24 (36.4)     | 0.757 | exact |
|                                     | Present                                                          | 17 (36.2)     | 28 (42.4)     |       |       |
|                                     | Unknown                                                          | 12 (25.5)     | 14 (21.2)     |       |       |

**Supplementary Table 1:** Clinical characteristics of Nulliparous and PPBC patients.

|                                                               |                | PPBC       |
|---------------------------------------------------------------|----------------|------------|
|                                                               |                | 66         |
| Gravidity (G) (%)                                             | 1              | 12 ( 18.2) |
|                                                               | 2              | 29 ( 43.9) |
|                                                               | 3              | 13 ( 19.7) |
|                                                               | 4              | 7 ( 10.6)  |
|                                                               | 5              | 2 ( 3.0)   |
|                                                               | Missing        | 3 ( 4.5)   |
|                                                               | Parity (P) (%) | 1          |
| 2                                                             |                | 32 ( 48.5) |
| 3                                                             |                | 12 ( 18.2) |
| 4                                                             |                | 2 ( 3.0)   |
| Missing                                                       |                | 1 ( 1.5)   |
| Duration Between Last Childbirth and BC Diagnosis (Years) (%) |                | 0 - <=2    |
|                                                               | >2 - <=5       | 28 ( 42.4) |
|                                                               | Missing        | 0 ( 0.0)   |

**Supplementary Table 2:** Reproductive history of PPBC patients.

|                                 | level    | Nullip    | PPBC      | p     | test  |
|---------------------------------|----------|-----------|-----------|-------|-------|
| n (%)                           |          | 47        | 66        |       |       |
| Vital Status (Per Last Contact) | Alive    | 33 (70.2) | 51 (77.3) | 0.513 | exact |
|                                 | Deceased | 14 (29.8) | 15 (22.7) |       |       |
| Recurrence?                     | Missing  | 0 (0.0)   | 1 (1.5)   | 0.871 | exact |
|                                 | No       | 27 (57.4) | 42 (63.6) |       |       |
|                                 | Other    | 3 (6.4)   | 4 (6.1)   |       |       |
|                                 | Yes      | 17 (36.2) | 19 (28.8) |       |       |

**Supplementary Table 3:** Outcomes for Nulliparous and PPBC patients in cohort.

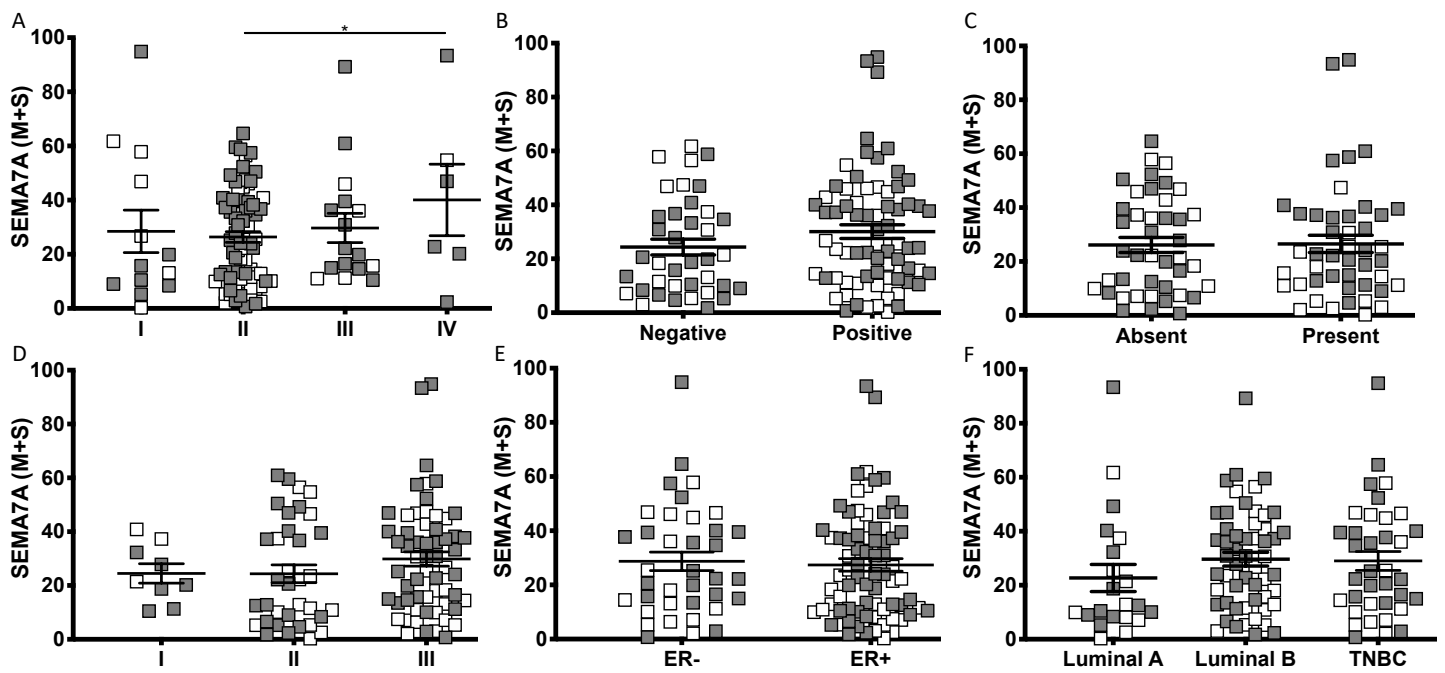

**Supplementary Figure 1: Semaphorin 7a expression does not differ with breast cancer clinical characteristics.** % SEMA7A medium + strong (M+S) staining in cohort of 113 cases with nulliparous cases denoted as white squares and postpartum cases as grey squares. A) Stage, B) Lymph node involvement, C) Lymphovascular invasion, D) Grade, E) ER status, and F) Tumor biological subtype.

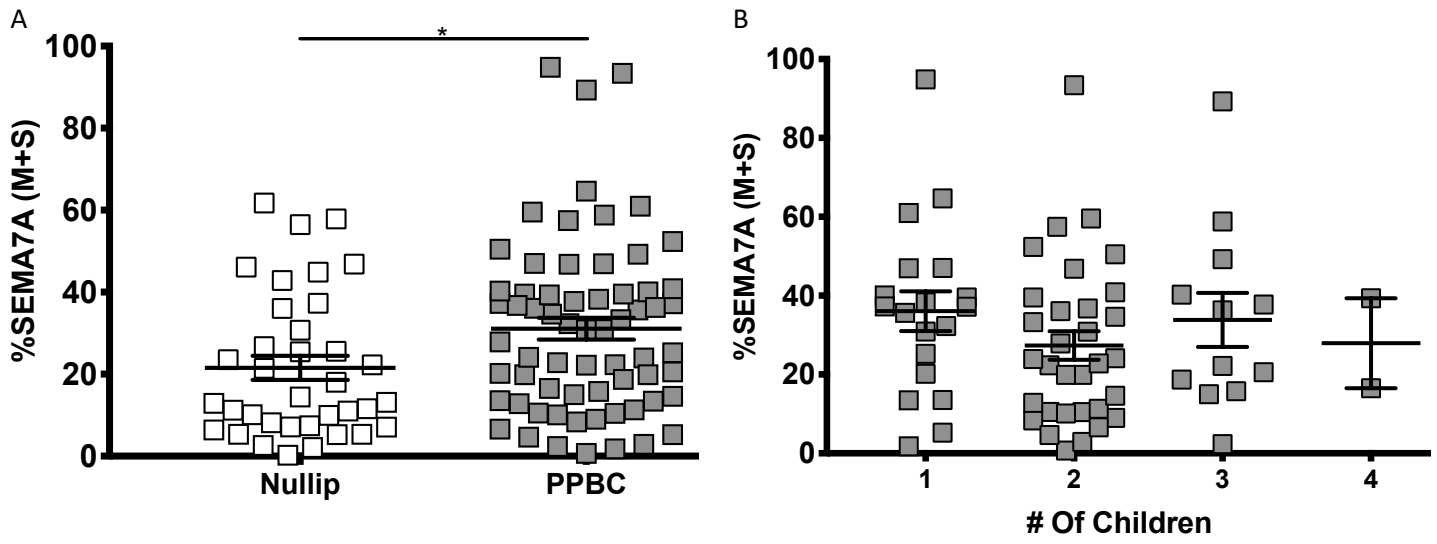

**Supplementary Figure 2:** A) Cases with gravidity >0 were removed in the nulliparous group. B) Semaphorin 7a expression separated by number of children.

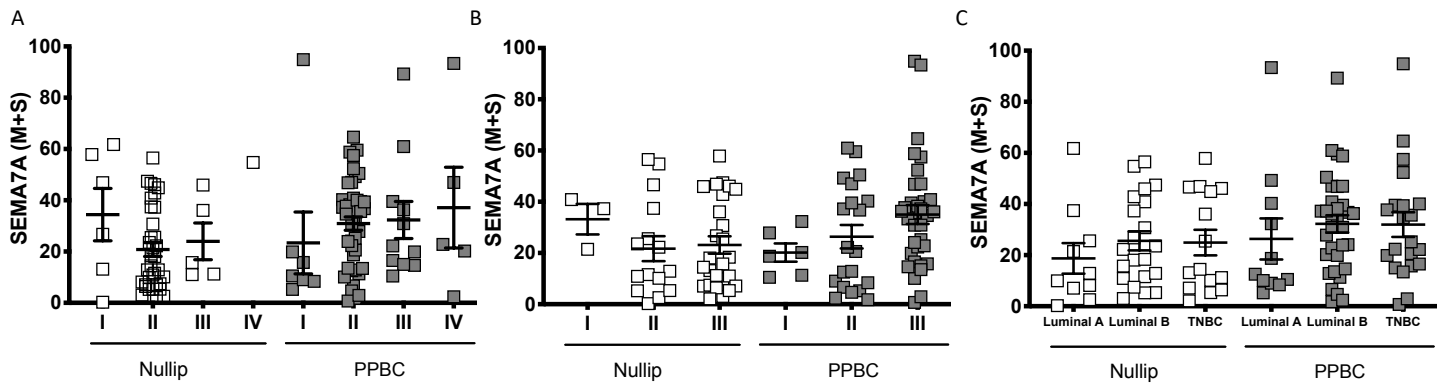

**Supplementary Figure 3:** SEMA7A expression in Nulliparous cases (white) and postpartum breast cancers (grey) separated by A) Stage, B) Grade, and C) Tumor Biological subtype. A-nova test.

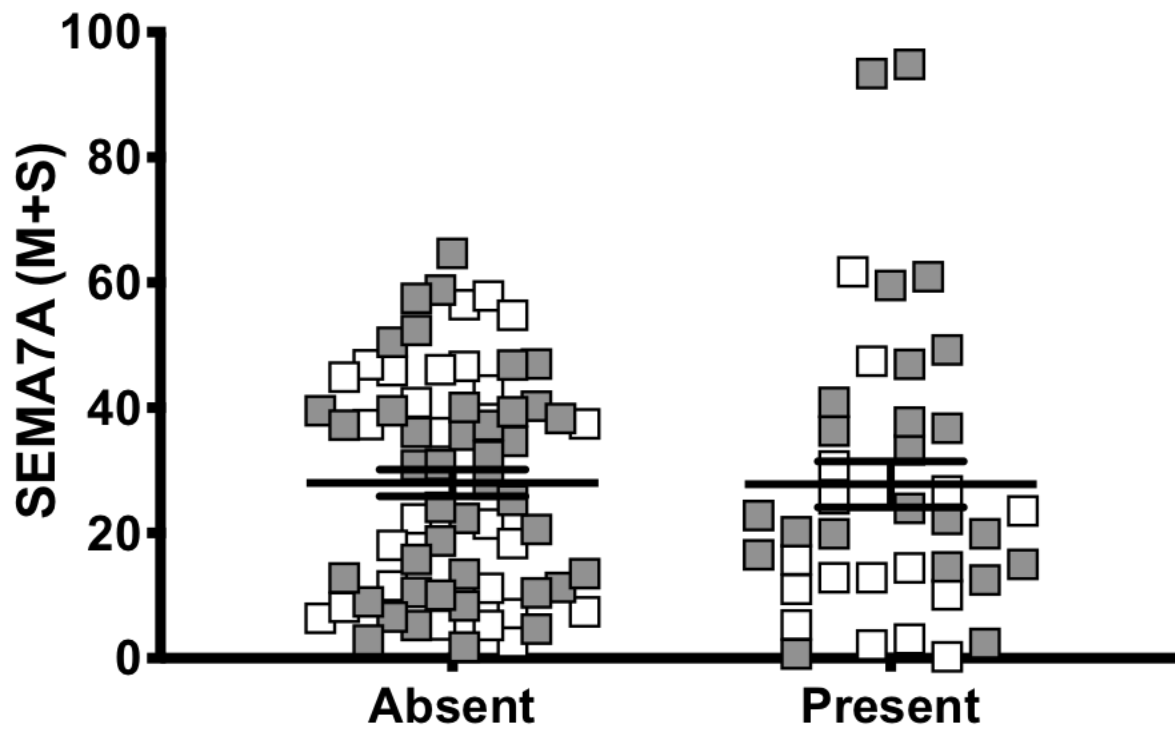

**Supplementary Figure 4:** Semaphorin 7a expression and the absence or presence of any recurrence (local, regional, and metastatic) in nulliparous (white) and postpartum (grey) groups.

| Parity Group                  | PPBC (Low SEMA7a) |      | PPBC (High SEMA7A) |      |
|-------------------------------|-------------------|------|--------------------|------|
|                               | N= 35             |      | N= 24              |      |
|                               | No. (%)           |      | No. (%)            |      |
| <b>Mean age at diagnosis</b>  | 36                |      | 35                 |      |
| <b>Age Range</b>              | 26-45             |      | 27-44              |      |
| <b>Histologic subtype</b>     |                   |      |                    |      |
| Ductal                        | 27                | 77.1 | 21                 | 87.5 |
| Lobular                       | 4                 | 11.4 | 0                  | 0.0  |
| Ductal + Lobular              | 0                 | 0.0  | 1                  | 4.2  |
| Inflammatory                  | 1                 | 2.9  | 1                  | 4.2  |
| Other                         | 2                 | 5.7  | 1                  | 4.2  |
| Missing                       | 1                 | 2.9  |                    | 0.0  |
| <b>Stage</b>                  |                   |      |                    |      |
| 0                             | 0                 | 0.0  | 0                  | 0.0  |
| I                             | 6                 | 17.1 | 1                  | 4.2  |
| II                            | 23                | 65.7 | 20                 | 83.3 |
| III                           | 6                 | 17.1 | 3                  | 12.5 |
| IV                            | 0                 | 0.0  | 0                  | 0.0  |
| <b>Estrogen status</b>        |                   |      |                    |      |
| ER+                           | 23                | 65.7 | 16                 | 66.7 |
| ER-                           | 12                | 34.3 | 8                  | 33.3 |
| <b>Progesterone status</b>    |                   |      |                    |      |
| PR+                           | 19                | 54.3 | 16                 | 66.7 |
| PR-                           | 15                | 42.9 | 8                  | 33.3 |
| Missing                       | 1                 | 2.9  | 0                  | 0.0  |
| <b>Biologic subtype</b>       |                   |      |                    |      |
| Luminal A                     | 8                 | 22.9 | 2                  | 8.3  |
| Luminal B                     | 14                | 40.0 | 14                 | 58.3 |
| Triple negative               | 12                | 34.3 | 8                  | 33.3 |
| Other                         | 1                 | 2.9  | 0                  | 0.0  |
| <b>Tumor Pathologic Grade</b> |                   |      |                    |      |
| Grade I                       | 5                 | 14.3 | 0                  | 0.0  |
| Grade II                      | 10                | 28.6 | 9                  | 37.5 |
| Grade III                     | 16                | 45.7 | 14                 | 58.3 |
| Missing                       | 4                 | 11.4 | 1                  | 4.2  |

**Supplementary Table 4:** Clinical characteristics of PPBC patients stratified by SEMA7A positivity.
